# Supplementary material for: DECKO: Single-oligo, dual-CRISPR deletion of genomic elements including long non-coding RNAs
Source: PubMed Central journal article supplement (PMC4619085; doi:10.1186/s12864-015-2086-z), 2015-10-23

# FIGURE S5

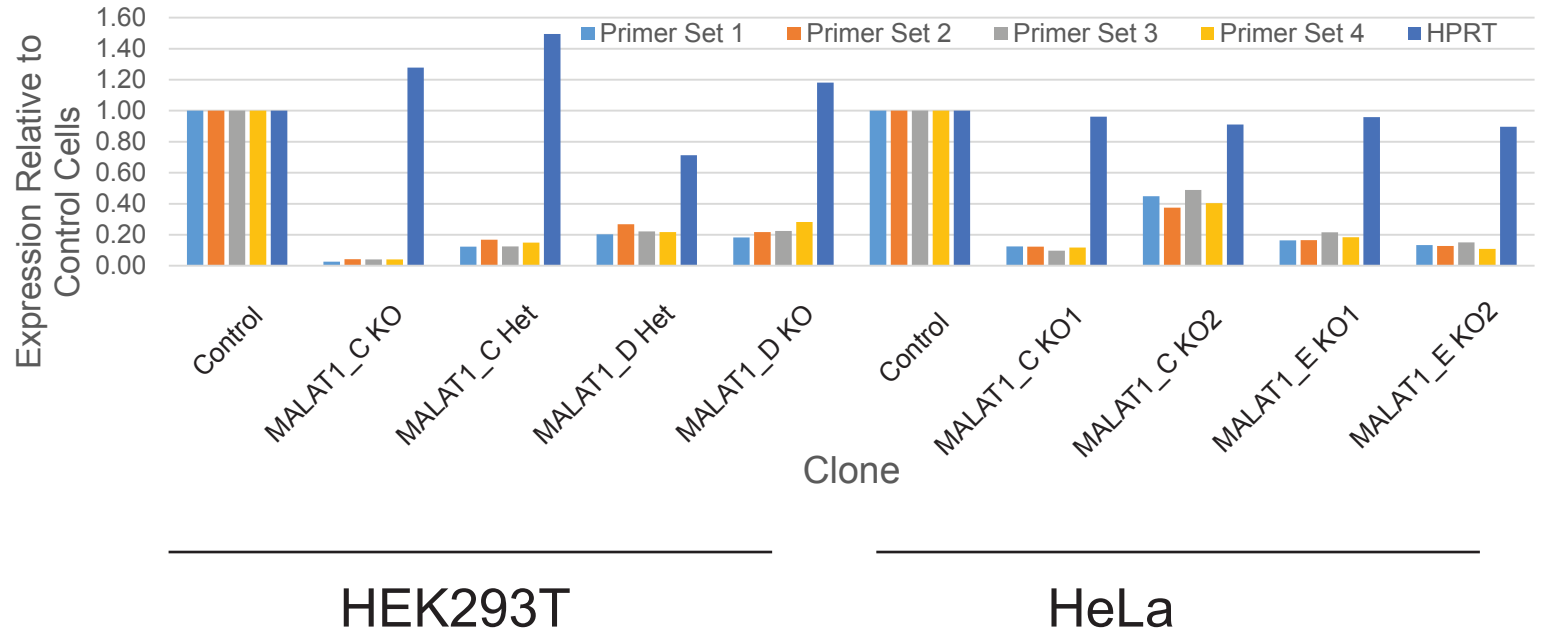

Supplement: 12864_2015_2086_MOESM5_ESM.pdf [file 12864_2015_2086_MOESM5_ESM.pdf]
